# Supplementary material
Source: PubMed Central journal article supplement (PMC2519703)
Supplement: supp_28_16_5014__1.pdf [file supp_28_16_5014__1.pdf]

Table S1<sup>a</sup>: Proteins identified in MHC II complex by Nano-LC/MS/MS

Total: 41 genes

Transmembrane proteins 22 Genes

| GI_ACCESSION | DAVID Gene Name                                                                                       |
|--------------|-------------------------------------------------------------------------------------------------------|
| 18202604     | ATPASE, CA <sup>++</sup> TRANSPORTING, UBIQUITOUS                                                     |
| 16307541     | ATPASE, NA <sup>+</sup> /K <sup>+</sup> TRANSPORTING, ALPHA 1 POLYPEPTIDE                             |
| 6671664      | CALNEXIN                                                                                              |
| 6680880      | CD37 ANTIGEN                                                                                          |
| 29789020     | CD74 ANTIGEN (INVARIANT POLYPEPTIDE OF MAJOR HISTOCOMPATIBILITY COMPLEX, CLASS II ANTIGEN-ASSOCIATED) |
| 46195798     | DOLICHYL-DI-PHOSPHOOLIGOSACCHARIDE-PROTEIN GLYCOTRANSFERASE                                           |
| 16359229     | RIBOPHORIN I                                                                                          |
| 31982789     | HISTOCOMPATIBILITY 2, CLASS II ANTIGEN E ALPHA                                                        |
| 6671710      | CD20, MEMBRANE-SPANNING 4-DOMAINS, SUBFAMILY A, MEMBER 1                                              |
| 6649863      | MHC CLASS II BETA                                                                                     |
| 34996495     | RIBOPHORIN II                                                                                         |
| 37359796     | RIKEN CDNA 2410014A08 GENE                                                                            |
| 14919430     | SIGNAL SEQUENCE RECEPTOR, DELTA                                                                       |
| 22766917     | SOLUTE CARRIER FAMILY 1 (NEUTRAL AMINO ACID TRANSPORTER), MEMBER 5                                    |
| 31560670     | CD98, SOLUTE CARRIER FAMILY 3 (ACTIVATORS OF DIBASIC AND NEUTRAL AMINO ACID TRANSPORT), MEMBER 2      |
| 52430429     | TAP BINDING PROTEIN                                                                                   |

11596855 TRANSFERRIN RECEPTOR

13385718 TRANSMEMBRANE EMP24 PROTEIN TRANSPORT DOMAIN  
CONTAINING 9

40555903 TRANSMEMBRANE EMP24-LIKE TRAFFICKING PROTEIN 10  
(YEAST)

7305539 TRANSPORTER 1, ATP-BINDING CASSETTE, SUB-FAMILY B  
(MDR/TAP)

549045 TRANSPORTER 2, ATP-BINDING CASSETTE, SUB-FAMILY B  
(MDR/TAP)

7305623 VESICLE-ASSOCIATED MEMBRANE PROTEIN, ASSOCIATED  
PROTEIN A

cellular metabolism 19 Genes

| GI_ACCESSION | DAVID Gene Name                                                                                              |
|--------------|--------------------------------------------------------------------------------------------------------------|
| 6671664      | CALNEXIN                                                                                                     |
| 29789020     | CD74 ANTIGEN (INVARIANT POLYPEPTIDE OF MAJOR<br>HISTOCOMPATIBILITY COMPLEX, CLASS II ANTIGEN-<br>ASSOCIATED) |
| 6753322      | CHAPERONIN SUBUNIT 4 (DELTA)                                                                                 |
| 46195798     | DOLICHYL-DI-PHOSPHOOLIGOSACCHARIDE-PROTEIN<br>GLYCOTRANSFERASE                                               |
| 54114937     | ENOLASE 1, ALPHA NON-NEURON                                                                                  |
| 16359229     | RIBOPHORIN I                                                                                                 |
| 2598562      | HEAT SHOCK 70KD PROTEIN 5 (GLUCOSE-REGULATED<br>PROTEIN)                                                     |
| 55250073     | HEAT SHOCK PROTEIN 8                                                                                         |
| 53600        | PROLIFERATING CELL NUCLEAR ANTIGEN                                                                           |
| 31981562     | PYRUVATE KINASE, MUSCLE                                                                                      |

34996495 RIBOPHORIN II

26353478 RIBOSOMAL PROTEIN L12

12847921 RIBOSOMAL PROTEIN S3

31560670 CD98, SOLUTE CARRIER FAMILY 3 (ACTIVATORS OF  
DIBASIC AND NEUTRAL AMINO ACID TRANSPORT),  
MEMBER 2

11596855 TRANSFERRIN RECEPTOR; CD71

549045 TRANSPORTER 2, ATP-BINDING CASSETTE, SUB-FAMILY B  
(MDR/TAP)

6678469 TUBULIN, ALPHA 6

12963615 TUBULIN, BETA 3

30023842 VALOSIN CONTAINING PROTEIN

Intracellular transport 17 Genes

GI\_ACCESSION DAVID Gene Name

809561 ACTIN, GAMMA, CYTOPLASMIC 1

31980648 ATP SYNTHASE, H<sup>+</sup> TRANSPORTING MITOCHONDRIAL F1  
COMPLEX, BETA SUBUNIT

6680748 ATP SYNTHASE, H<sup>+</sup> TRANSPORTING, MITOCHONDRIAL F1  
COMPLEX, ALPHA SUBUNIT, ISOFORM 1

18202604 ATPASE, CA<sup>++</sup> TRANSPORTING, UBIQUITOUS

16307541 ATPASE, NA<sup>+</sup>/K<sup>+</sup> TRANSPORTING, ALPHA 1 POLYPEPTIDE

29789020 CD74 ANTIGEN (INVARIANT POLYPEPTIDE OF MAJOR  
HISTOCOMPATIBILITY COMPLEX, CLASS II ANTIGEN-  
ASSOCIATED)

6679687 PROTEIN DISULFIDE ISOMERASE ASSOCIATED 3

37359796 RIKEN CDNA 2410014A08 GENE

22766917 SOLUTE CARRIER FAMILY 1 (NEUTRAL AMINO ACID

TRANSPORTER), MEMBER 5

11596855 TRANSFERRIN RECEPTOR

13385718 TRANSMEMBRANE EMP24 PROTEIN TRANSPORT DOMAIN  
CONTAINING 9

40555903 TRANSMEMBRANE EMP24-LIKE TRAFFICKING PROTEIN 10  
(YEAST)

7305539 TRANSPORTER 1, ATP-BINDING CASSETTE, SUB-FAMILY B  
(MDR/TAP)

549045 TRANSPORTER 2, ATP-BINDING CASSETTE, SUB-FAMILY B  
(MDR/TAP)

6678469 TUBULIN, ALPHA 6

12963615 TUBULIN, BETA 3

30023842 VALOSIN CONTAINING PROTEIN

Endoplasmic Reticulum 16 Genes

GI\_ACCESSION DAVID Gene Name

18202604 ATPASE, CA<sup>++</sup> TRANSPORTING, UBIQUITOUS

6671664 CALNEXIN

46195798 DOLICHYL-DI-PHOSPHOOLIGOSACCHARIDE-PROTEIN  
GLYCOTRANSFERASE

16359229 RIBOPHORIN I

2598562 HEAT SHOCK 70KD PROTEIN 5 (GLUCOSE-REGULATED  
PROTEIN)

31982789 HISTOCOMPATIBILITY 2, CLASS II ANTIGEN E ALPHA

6679687 PROTEIN DISULFIDE ISOMERASE ASSOCIATED 3

34996495 RIBOPHORIN II

37359796 RIKEN CDNA 2410014A08 GENE

14919430 SIGNAL SEQUENCE RECEPTOR, DELTA

52430429 TAP BINDING PROTEIN

13385718 TRANSMEMBRANE EMP24 PROTEIN TRANSPORT DOMAIN  
CONTAINING 9

40555903 TRANSMEMBRANE EMP24-LIKE TRAFFICKING PROTEIN 10  
(YEAST)

7305539 TRANSPORTER 1, ATP-BINDING CASSETTE, SUB-FAMILY B  
(MDR/TAP)

549045 TRANSPORTER 2, ATP-BINDING CASSETTE, SUB-FAMILY B  
(MDR/TAP)

30023842 VALOSIN CONTAINING PROTEIN

ANTIGEN PROCESSING 10 Genes

AND PRESENTATION

| GI_ACCESSION | DAVID Gene Name                                                                                              |
|--------------|--------------------------------------------------------------------------------------------------------------|
| 6671664      | CALNEXIN                                                                                                     |
| 29789020     | CD74 ANTIGEN (INVARIANT POLYPEPTIDE OF MAJOR<br>HISTOCOMPATIBILITY COMPLEX, CLASS II ANTIGEN-<br>ASSOCIATED) |
| 2598562      | HEAT SHOCK 70KD PROTEIN 5 (GLUCOSE-REGULATED<br>PROTEIN)                                                     |
| 55250073     | HEAT SHOCK PROTEIN 8                                                                                         |
| 31982789     | HISTOCOMPATIBILITY 2, CLASS II ANTIGEN E ALPHA                                                               |
| 6649863      | MHC CLASS II BETA                                                                                            |
| 6679687      | PROTEIN DISULFIDE ISOMERASE ASSOCIATED 3                                                                     |
| 52430429     | TAP BINDING PROTEIN                                                                                          |
| 7305539      | TRANSPORTER 1, ATP-BINDING CASSETTE, SUB-FAMILY B<br>(MDR/TAP)                                               |
| 549045       | TRANSPORTER 2, ATP-BINDING CASSETTE, SUB-FAMILY B                                                            |

(MDR/TAP)

Molecular Chaperone 5 Genes

| GI_ACCESSION | DAVID Gene Name                                                                                       |
|--------------|-------------------------------------------------------------------------------------------------------|
| 6671664      | CALNEXIN                                                                                              |
| 29789020     | CD74 ANTIGEN (INVARIANT POLYPEPTIDE OF MAJOR HISTOCOMPATIBILITY COMPLEX, CLASS II ANTIGEN-ASSOCIATED) |
| 6753322      | CHAPERONIN SUBUNIT 4 (DELTA)                                                                          |
| 2598562      | HEAT SHOCK 70KD PROTEIN 5 (GLUCOSE-REGULATED PROTEIN)                                                 |
| 55250073     | HEAT SHOCK PROTEIN 8                                                                                  |

uncluster 4 Genes

| GI_ACCESSION | DAVID Gene Name                                                       |
|--------------|-----------------------------------------------------------------------|
| 19527026     | LEUCINE RICH REPEAT CONTAINING 59                                     |
| 23272960     | COMPLEMENT COMPONENT 1, Q SUBCOMPONENT BINDING PROTEIN                |
| 28302158     | RIKEN CDNA 2610307O08 GENE                                            |
| 56023216     | SIMILAR TO GLYCERALDEHYDE-3-PHOSPHATE DEHYDROGENASE (PHOSPHORYLATING) |

<sup>a</sup> Proteins in MHC II immunoprecipitation, identified by at least two unique peptides, were functional clustered using DAVID program.

Table S2: PCR primers

| Name          | Sequence                                                                                                            |
|---------------|---------------------------------------------------------------------------------------------------------------------|
| MPY5          | 5'-GGAGTCCTGCTAGGTGTCCA-3'                                                                                          |
| MPY3          | 5'-CTGTTGACCTGTGTGGATGG-3'                                                                                          |
| MPYS-EGFP-For | 5'CA CCG GTC TAG GAA GCA GAA TTC GCC ACC ATG CCA TAC TCC AAC<br>CTG CAT CCA GCC-3'                                  |
| MPYS-EGFP-Rev | 5'G ACT AGG CTG TCC GCG GCC GCA GAT GAG GTC AG3'<br>5'-TCA CTC GAG TCA AGC GTA GTC TGG GAC GTC GTA TGG GTA GAT GAG  |
| HA-MPY-Rev    | GTC AGT GCG GAG TGG GAG AGG-3'                                                                                      |
| GST-MPYS-For  | 5'CAG ACC CTG TTT GCC GGG ATC CAG GAT GCC AAA GCT GGC-3'                                                            |
| GST-MPYS-Rev  | 5'CCC AGA CAA GGC TGT CCG CGG CCG CGA TGA GGT CAG TGC G-3'<br>5'TGGATCCGAATGTTCAATCATTCAAGAGATGATTGAACATTCGGATCCTTT |
| Sh5-For       | TTTC<br>5'TCGAGAAAAAAGGATCCGAATGTTCAATCATCTCTTGAATGATTGAACAT                                                        |
| Sh5-Rev       | TCGGATCCA-3'.                                                                                                       |
| Sh7-For       | 5'TGCACATTCGTCAGGAAGAATTCAAGAGATTCTTCCTGACGAAT-3'<br>5'TCGAGAAAAAAGCACATTCGTCAGGAAGAATCTCTTGAATTCTTCCTGAC           |
| Sh7-Rev       | GAATGTGCA-3'                                                                                                        |

A

H-2 class II histocompatibility antigen alpha chain.

|     |                   |                   |                   |                   |                   |            |            |                   |     |
|-----|-------------------|-------------------|-------------------|-------------------|-------------------|------------|------------|-------------------|-----|
| 1   | MPCSRALILG        | VLANTMLSL         | CGGEDDIEAD        | HVGFYGTIVY        | QSPGDIGQYT        | HEFDGDLEFY | VLDLKKKTWV | <u>RLPEFGOLIL</u> | 80  |
| 81  | <u>FEPOGGLONI</u> | <u>AAEKHNLGIL</u> | <u>TKRSNETPAT</u> | <u>NEAPOATVFP</u> | <u>KSPVLLGQPN</u> | TLICFVDNIF | PPVINITWLR | <u>NSKSVTDGVY</u> | 160 |
| 161 | <u>ETSLVNRDH</u>  | SFHKLSYLTf        | IPSDDDIYDC        | KVEHWGLEEP        | VLKHWEPEIP        | APMSELTETV | VCALGLSVGL | VGIVVGTIFI        | 240 |
| 241 | <u>IQGLRSGGTS</u> | <u>RHPGPL</u>     |                   |                   |                   |            |            |                   | 256 |

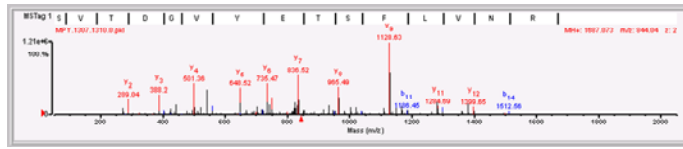

H-2 class II histocompatibility antigen, beta chain.

|     |                  |                   |                   |                    |                   |                   |                   |                   |     |
|-----|------------------|-------------------|-------------------|--------------------|-------------------|-------------------|-------------------|-------------------|-----|
| 1   | MALQIPSLLL       | SAAVVVLMLV        | SSPRTEGGNS        | ER <u>HVVVQFKG</u> | ECYYTNGTQR        | <u>IRLVTRYIVN</u> | <u>REEVRYVSD</u>  | <u>VGEYRAVTEL</u> | 80  |
| 81  | GRPDAEYWNS       | QPEILERTRA        | <u>EVDTACRHHY</u> | <u>EGPETSTSLR</u>  | <u>RLEOPNVAIS</u> | <u>LSRTEALNHH</u> | <u>NTLVCSVTDF</u> | <u>YPAKIKVRWF</u> | 160 |
| 161 | <u>RNGOETVGV</u> | <u>SSTOLIRNGD</u> | WTFQVLVMLE        | MTPHQGEVYT         | CHVEHPSLKs        | <u>PITVEWRAQS</u> | ESARSKMLSG        | IGGCVLGVIF        | 240 |
| 241 | LGLGLFIRHR       | SQKGRGPPPP        | AGLLQ             |                    |                   |                   |                   |                   | 265 |

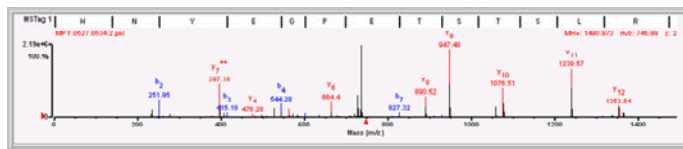

CD20

|     |            |            |            |            |            |            |                   |                   |     |
|-----|------------|------------|------------|------------|------------|------------|-------------------|-------------------|-----|
| 1   | MSGPFAEPT  | KGPLAMQPAP | KVNLKRTSSL | VGPTQSFMR  | ESKALGAVQI | MNGLFHITLG | GLLMIPTGVF        | APICLSVWYP        | 80  |
| 81  | LWGGIMYIIS | GSLAAAAEK  | TSRKSLVKAK | VIMSSLSLFA | AISGILSIM  | DILNMTLSHF | LKMRRLELIQ        | TSKPYVDIYD        | 160 |
| 161 | CEPSNSSEKN | SPTQYCNIS  | QSVFLGILSA | MLISAFFQL  | VTAGIVENEW | KRMCTRSKSN | <u>VVLLSAGEKN</u> | <u>EOTIKMKEEI</u> | 240 |
| 241 | IELSGVSSQP | KNEEIEIIP  | VQEEEEEEAE | INFPAPPQEQ | ESLPVENEIA | P          |                   |                   | 291 |

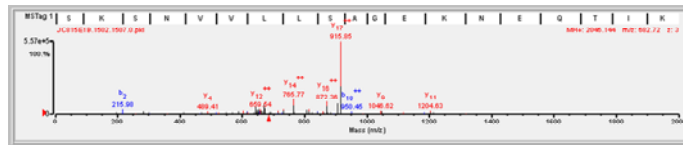

CD37

|     |            |            |            |            |            |                   |                    |                   |     |
|-----|------------|------------|------------|------------|------------|-------------------|--------------------|-------------------|-----|
| 1   | MSAQESCLSL | IKYFLVFNL  | FFFVLGGLIF | CFGTWILIDK | TSFVSFVGLS | FVPLQTSKVV        | LAVSGVLTMA         | LALLGCVGAL        | 80  |
| 81  | KELRCLLGLY | FGMLLLFAT  | QITLGILIST | QRVRLERRVQ | ELVRLTIQSY | <u>RTNPDETAEE</u> | <u>ESWDYAOQFOL</u> | <u>RCCGWQSPRD</u> | 160 |
| 161 | WNKAQMLKAN | ESEEPVPCS  | CYNSTATNDS | TVFDKLFPSQ | LSRLGPRAKL | <u>ROTADICALP</u> | <u>AKAHYREGC</u>   | AQSLQKWLHN        | 240 |
| 241 | NIISVIGICL | GVGELLELGF | TLSIFLCRNL | DHVDRLARY  | R          |                   |                    |                   | 281 |

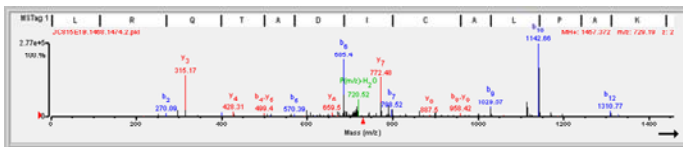

RIKEN cDNA 2610307008

|     |                              |             |            |            |                  |                              |                              |                   |     |
|-----|------------------------------|-------------|------------|------------|------------------|------------------------------|------------------------------|-------------------|-----|
| 1   | MPYSNLHPAI                   | PRPRGHRSKY  | VALIFLVASL | MILWVAKDPP | NHTLKYALAH       | LASHELGLLL                   | KNLCLAEEL                    | CHVQSRVQGS        | 80  |
| 81  | YWKAVRACLG                   | CPIHCMAMIL  | LSSYFYFLQN | TADIYLSWMF | GLLVLYKSL        | MLLGLQLSTP                   | AEVSAVCEEK                   | KLNVAHGLAW        | 160 |
| 161 | SYIYIGYRLI                   | LPGLQAR IRM | FNQLHNNMLS | GAGSRRLYIL | FPLDCGVDPN       | LSVVDPNIRF                   | RDMLPQQNID                   | RAGIKNRVYS        | 240 |
| 241 | NSVYEILENG                   | QPAGVCILEY  | ATPLQTLFAM | SQDAKAGFSR | EDRLEQAKLF       | <u>CR<del>TLEI</del>EILD</u> | <u>VPESRNNCR<del>L</del></u> | <u>IVYOEPTDGN</u> | 320 |
| 321 | <u>SFSLSOEVL<del>R</del></u> | HIRQEEKEEV  | TMNAPMTSVA | PPPSVLSQEP | <u>RLISGMDQP</u> | <u>LPLRTDLI</u>              |                              |                   | 378 |

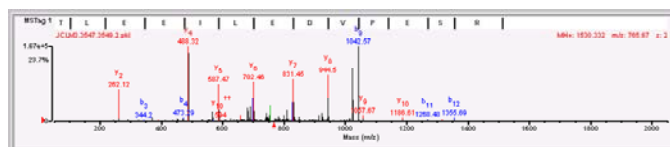



B

H-2 class II histocompatibility antigen alpha chain.

|     |                          |                          |                   |                   |                   |                   |                   |                          |     |
|-----|--------------------------|--------------------------|-------------------|-------------------|-------------------|-------------------|-------------------|--------------------------|-----|
| 1   | <b>MPCSRALILG</b>        | <b>VLALNTMLSL</b>        | <b>CGGEDIEAD</b>  | <b>HVGFYGTIVY</b> | <b>QSPGDIGQYT</b> | <b>HEFDGDELFY</b> | <b>VLDLKKKTVW</b> | <u><b>RLPEFGOLIL</b></u> | 80  |
| 81  | <u><b>FEPOGGLONI</b></u> | <u><b>AAEKHNLGIL</b></u> | <b>TKRSNFTPAT</b> | <b>NEAPQATVFP</b> | <b>KSPVLLGQPN</b> | <b>TLICFVDNIF</b> | <b>PPVINITWLR</b> | <u><b>NSKSVTDGVY</b></u> | 160 |
| 161 | <u><b>ETSFLVNRDH</b></u> | <b>SFHKLSYLTF</b>        | <b>IPSDDDIYDC</b> | <b>KVEHWGLEEP</b> | <b>VLKHWEPEIP</b> | <b>APMSELTETV</b> | <b>VCALGLSVGL</b> | <b>VGIVVGTIFI</b>        | 240 |
| 241 | <b>IQGLRSGGTS</b>        | <b>RHPGFL</b>            |                   |                   |                   |                   |                   |                          | 256 |

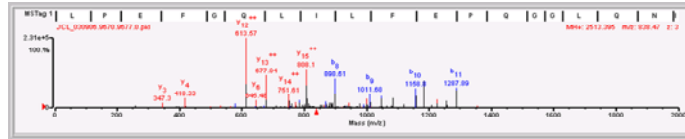

H-2 class II histocompatibility antigen, beta chain.

|     |                          |                          |                   |                   |                          |                          |                          |                          |     |
|-----|--------------------------|--------------------------|-------------------|-------------------|--------------------------|--------------------------|--------------------------|--------------------------|-----|
| 1   | <b>MALQIPSLLL</b>        | <b>SAAVVLMVL</b>         | <b>SSPRTEGGNS</b> | <b>ERHFVQFKG</b>  | <b>ECYYTNGTQR</b>        | <b>IRLVTRYIYN</b>        | <b>REEVRYDSD</b>         | <u><b>VGEYRAVTEL</b></u> | 80  |
| 81  | <u><b>GRPDAEYWNS</b></u> | <u><b>OPEILERTRA</b></u> | <b>EVDTACRHNY</b> | <b>EGPETSTSLR</b> | <u><b>RLEOPNVAIS</b></u> | <u><b>LSRTEALNHH</b></u> | <u><b>NTLVCSVTDF</b></u> | <u><b>YPAKIKVRWF</b></u> | 160 |
| 161 | <b>RNGQEETVGV</b>        | <b>SSTQLRNGD</b>         | <b>WTFQVLVMLE</b> | <b>MTPHQGEVYT</b> | <b>CHVEHPSLKS</b>        | <u><b>PITVEWRAQS</b></u> | <b>ESARSKMLSG</b>        | <b>IGGCVLGVIF</b>        | 240 |
| 241 | <b>LGLGLFIRHR</b>        | <b>SQKGRGPPP</b>         | <b>AGLLQ</b>      |                   |                          |                          |                          |                          | 265 |

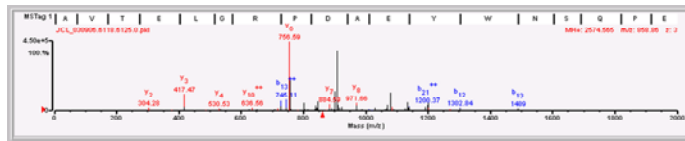

MPYS (RIKEN cDNA 2610307008)

|     |                          |                          |                          |                          |                          |                          |                          |                          |     |
|-----|--------------------------|--------------------------|--------------------------|--------------------------|--------------------------|--------------------------|--------------------------|--------------------------|-----|
| 1   | <u><b>MPYSNLHPAI</b></u> | <u><b>PRPRGRHSKY</b></u> | <b>VALIFLVASL</b>        | <b>MILWVAKDPP</b>        | <u><b>NHTLKYLAH</b></u>  | <u><b>LASHELGLLI</b></u> | <b>KNLCCLAEL</b>         | <b>CHVQSRYQGS</b>        | 80  |
| 81  | <b>YWKAVRACLG</b>        | <b>CPHMCAMIL</b>         | <b>LSSYFYFLQN</b>        | <b>TADIYLSWMF</b>        | <b>GLLVLYKSL</b>         | <b>MLLGLQSLTP</b>        | <b>AEVSAVCEEK</b>        | <b>KLNVAHGLAW</b>        | 160 |
| 161 | <b>SYIYGLRLI</b>         | <u><b>LPGLARIRM</b></u>  | <u><b>FNQLHNNMLS</b></u> | <u><b>GAGSRRLYL</b></u>  | <u><b>FPLDCGVDPN</b></u> | <u><b>LSVVDPNIRF</b></u> | <u><b>RDMLPQQNID</b></u> | <u><b>RAGIKNRVYS</b></u> | 240 |
| 241 | <b>NSVYEILENG</b>        | <b>QPAGVCILEY</b>        | <b>ATPLQTLFAM</b>        | <u><b>SQDAKAGFSR</b></u> | <u><b>EDRLEQAKLF</b></u> | <u><b>CRTEEHELD</b></u>  | <u><b>VPESRNNCRI</b></u> | <u><b>IVYOEPTDGN</b></u> | 320 |
| 321 | <u><b>SFSLSOEVL</b></u>  | <u><b>HIRQEEKEV</b></u>  | <u><b>TMNAPM TSA</b></u> | <u><b>PPPSVLSOEP</b></u> | <u><b>RLISGMDOP</b></u>  | <u><b>LPLRTDLI</b></u>   |                          |                          | 378 |

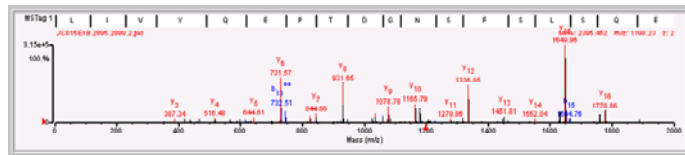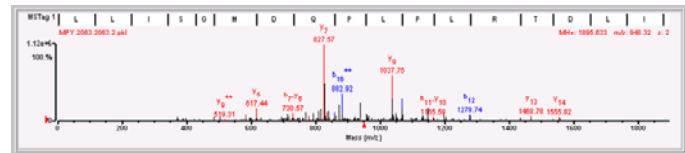

Figure S1: Spectrums of proteins identified in MHC II (A) or MPYS (B) complex by Nano-LC/MS/MS. Identified peptides is underlined.
